# Supplementary material for: Bio-carbon quantum dot modified TiO2 nanocrystals for photocatalytic degradation of PLA and PET microplastics
Source: Royal Society of Chemistry journal article supplement (doi:10.1039/d6ra00096g), 2026-03-02
Supplement: d6ra00096g1.pdf [file d6ra00096g1.pdf]

## Supporting Information

### Bio-Carbon Quantum Dots Modified TiO<sub>2</sub> Nanocrystals for Photocatalytic Degradation of PLA and PET microplastics

Min Zheng<sup>a</sup> Yangyi Wang<sup>b</sup> Yiheng Liu<sup>a</sup> Xiaoyan Jiang<sup>a</sup> Yannan Zhang<sup>a</sup>

Jinghao Huo<sup>c</sup>

<sup>a</sup>School of Photoelectric Engineering, Changzhou Institute of Technology, Changzhou, Jiangsu 213002, China.

<sup>b</sup>Changzhou Isovolt Technical Composite Co., Ltd, Changzhou, Jiangsu 213002, China.

<sup>c</sup>School of Materials Science and Engineering, Shaanxi Laboratory of Advanced Materials, Shaanxi University of Science and Technology, Xi' an, Shanxi 710021, China

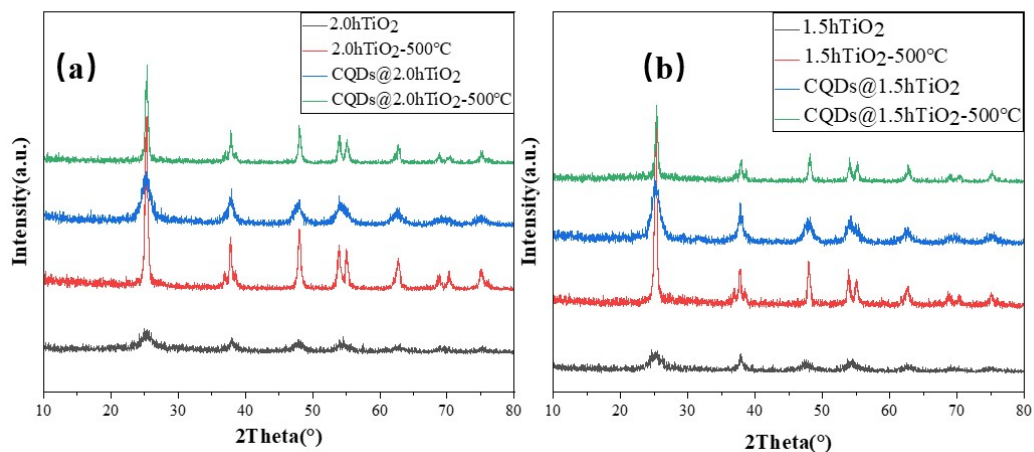

Fig S1. XRD patterns: (a) photocatalyst based on 1.5h TiO<sub>2</sub>, (b) photocatalyst based on 2hTiO<sub>2</sub>.

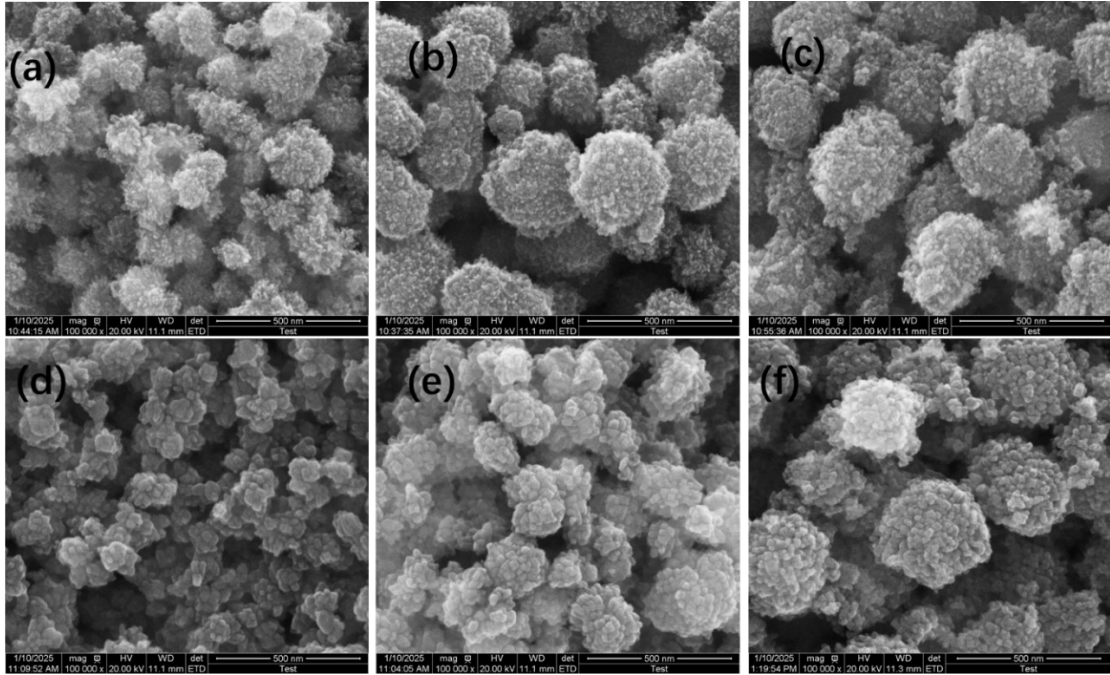

Fig S2. SEM images of  $\text{TiO}_2$  nanocrystals : (a)  $1\text{hTiO}_2$  ; (b)  $1.5\text{hTiO}_2$  ; (c)  $2\text{hTiO}_2$  ; (d)  $1\text{hTiO}_2\text{-}500^\circ\text{C}$  ; (e)  $1.5\text{hTiO}_2\text{-}500^\circ\text{C}$  ; (f)  $2\text{hTiO}_2\text{-}500^\circ\text{C}$ .

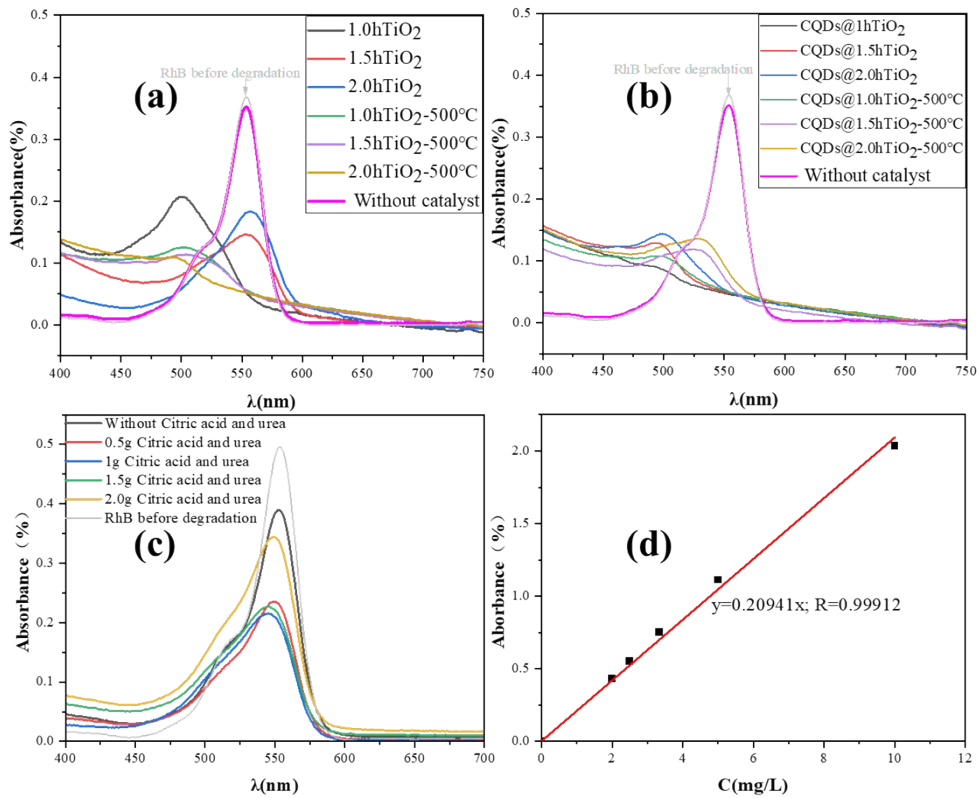

Fig S3 UV-Vis absorption spectra of the RhB solution after degradation 30min: (a)  $\text{TiO}_2$  photocatalyst; (b)  $\text{CQDs@TiO}_2$  photocatalyst. (c)  $\text{CQDs@1hTiO}_2$  prepared from different

concentrations of carbon sources; (d) RhB Absorbance- Concentration curve.

**Table S1.** Statistical data on the degradation of RhB by different photocatalysts (The value was obtained by calculating the absorbance at 554nm.).

| The catalysts                    | RhB C <sub>0</sub><br>(mg/L) | RhB C <sub>30min</sub><br>(mg/L) | Degradation rate (%) |
|----------------------------------|------------------------------|----------------------------------|----------------------|
| 1.0hTiO <sub>2</sub>             | 1.8                          | 0.2435                           | 86.47                |
| 1.5hTiO <sub>2</sub>             | 1.8                          | 0.6974                           | 61.27                |
| 2.0hTiO <sub>2</sub>             | 1.8                          | 0.8644                           | 51.99                |
| 1.0hTiO <sub>2</sub> -500°C      | 1.8                          | 0.2674                           | 85.14                |
| 1.5hTiO <sub>2</sub> -500°C      | 1.8                          | 0.2636                           | 85.41                |
| 2.0hTiO <sub>2</sub> -500°C      | 1.8                          | 0.2483                           | 86.20                |
| CQDs@1.0hTiO <sub>2</sub>        | 1.8                          | 0.2197                           | 87.80                |
| CQDs@1.5hTiO <sub>2</sub>        | 1.8                          | 0.2340                           | 87.00                |
| CQDs@2.0hTiO <sub>2</sub>        | 1.8                          | 0.2388                           | 86.74                |
| CQDs@1.0hTiO <sub>2</sub> -500°C | 1.8                          | 0.2388                           | 86.74                |
| CQDs@1.5hTiO <sub>2</sub> -500°C | 1.8                          | 0.3009                           | 83.29                |
| CQDs@2.0hTiO <sub>2</sub> -500°C | 1.8                          | 0.3868                           | 78.51                |
| Without photocatalyst            | 1.8                          | 1.6809                           | 6.62                 |

**Table S2.** Statistical data on the degradation of RhB by CQDs@1hTiO<sub>2</sub> prepared from different concentrations of carbon sources.

| The catalysts                                         | RhB C <sub>0</sub><br>(mg/L) | RhB C <sub>30min</sub><br>(mg/L) | Degradation<br>rate (%) |
|-------------------------------------------------------|------------------------------|----------------------------------|-------------------------|
| 1.0hTiO <sub>2</sub> (without Citric acid)            | 2.4                          | 1.853                            | 22.80                   |
| CQDs@1.0hTiO <sub>2</sub> (0.5g Citric acid and urea) | 2.4                          | 1.323                            | 44.88                   |
| CQDs@1.0hTiO <sub>2</sub> (1.0g Citric acid and urea) | 2.4                          | 0.9312                           | 61.20                   |
| CQDs@1.0hTiO <sub>2</sub> (1.5g Citric acid and urea) | 2.4                          | 0.9837                           | 59.01                   |
| CQDs@1.0hTiO <sub>2</sub> (2.0g Citric acid and urea) | 2.4                          | 1.581                            | 34.14                   |

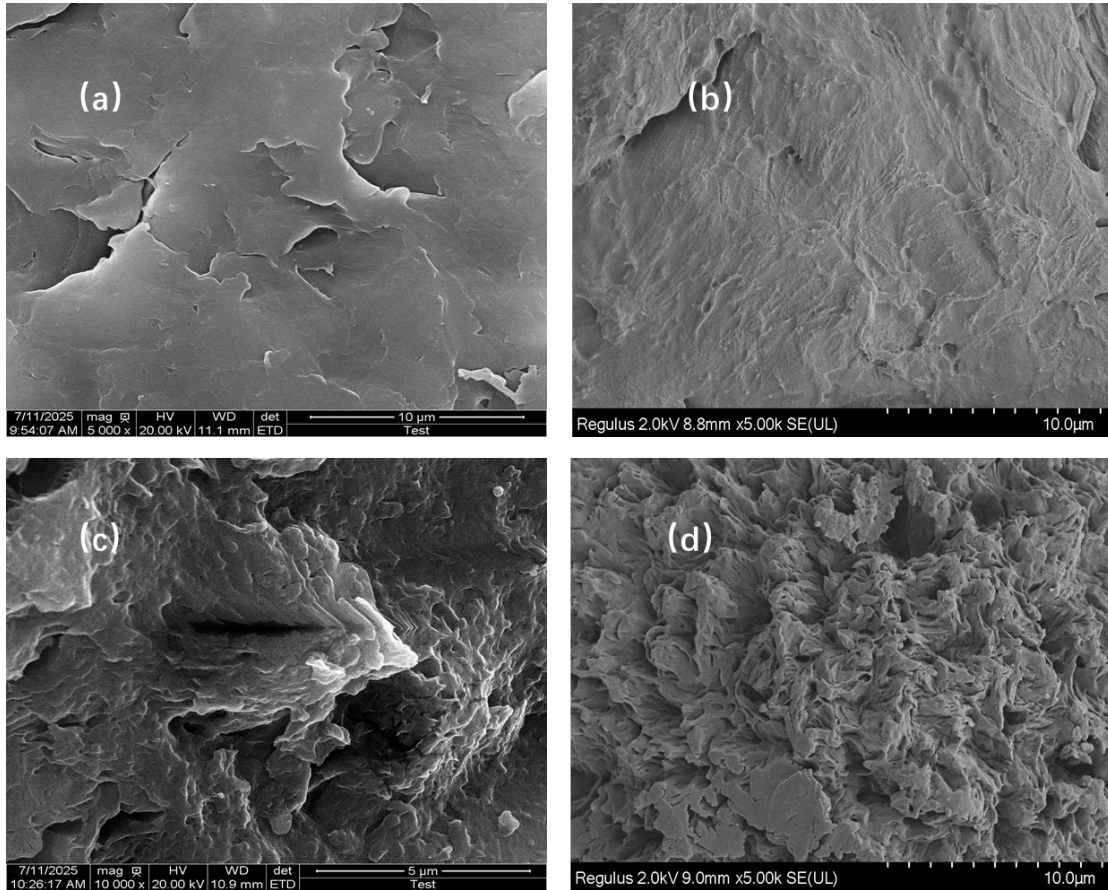

Fig S4. SEM images of microplastic surfaces: (a) untreated PET; (b) alkali-treated PET; (c) untreated PLA; (d) alkali-treated PLA.

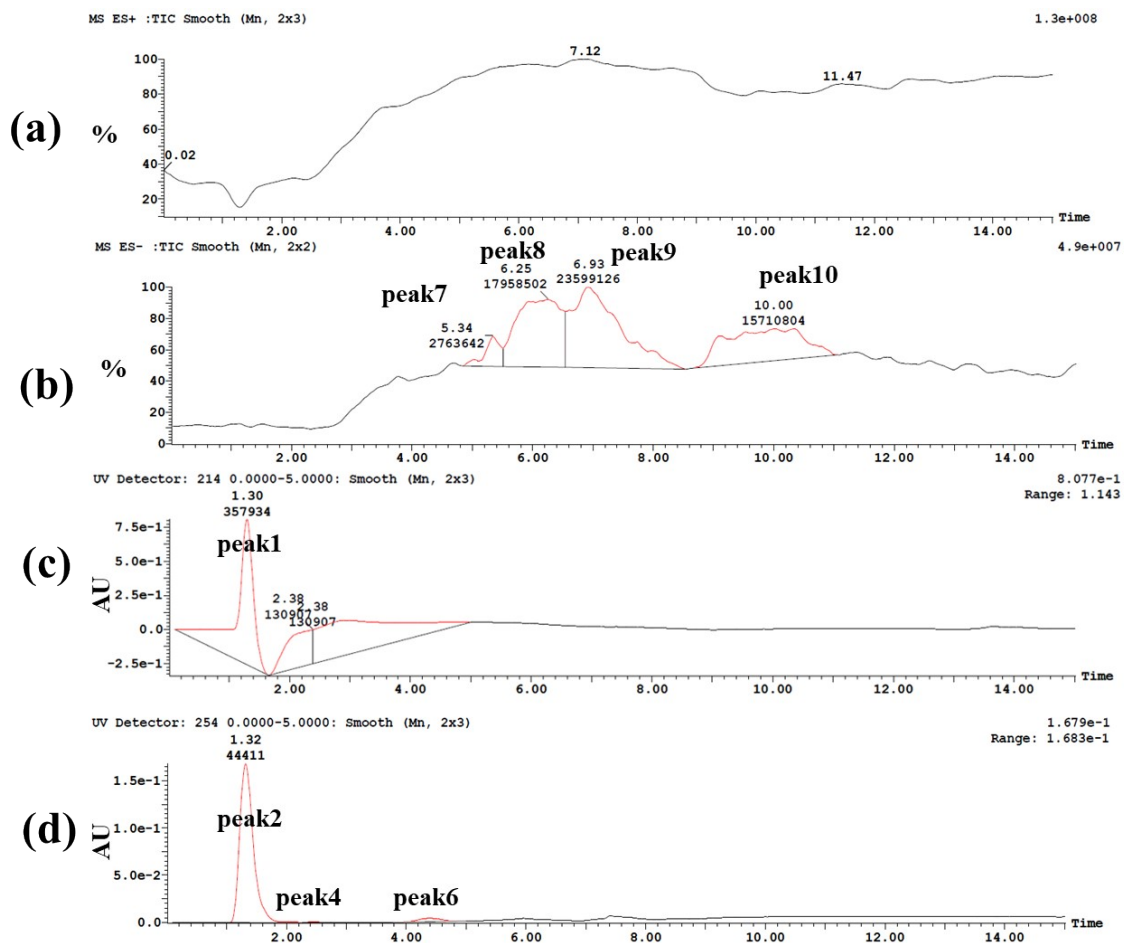

Fig S5. LC-MS and UV analysis of the PET: (a) Total ion chromatogram (TIC) obtained in MS ES<sup>+</sup>; (b) TIC of MS ES<sup>-</sup>; (c) UV absorbance chromatogram detected at 214 nm; (d) UV absorbance chromatogram detected at 254 nm.

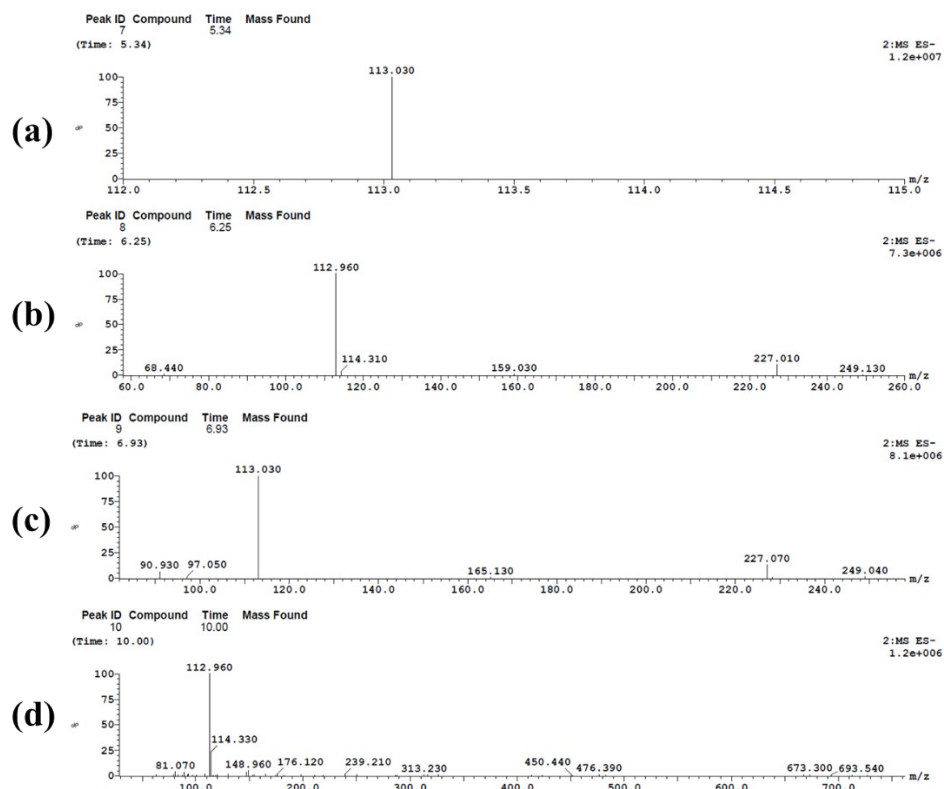

Fig S6 Negative-ion mode MS/MS spectra obtained by LC-MS of the main target compounds in PET degradation solution.

**Table S3** LC-MS Data for PET Degradation Products.

| Peak No. | Retention Time (min) | Main Detection Module     | AreaAbs  | Area %Total | m/z                                 | Possible Substance                                            |
|----------|----------------------|---------------------------|----------|-------------|-------------------------------------|---------------------------------------------------------------|
| 1        | 1.3                  | UV214<br>MS ES-<br>MS ES+ | 357934   | 40.66       | 143.000,284.910,<br>125.010,164.970 | Monomethyl terephthalate (TPM)+<br>Ethylene glycol oligomers  |
| 2        | 1.32                 | UV254<br>MS ES-<br>MS ES+ | 44411    | 95.26       | 142.990,165.070,<br>125.010,164.960 | terephthalic acid (TPA)+ Monomethyl<br>terephthalate isomer   |
| 7        | 5.34                 | MS ES-                    | 2763642  | 4.60        | 113.030                             | Terephthalate ion                                             |
| 8        | 6.25                 | MS ES-                    | 17958502 | 29.91       | 68.440, 112.960,<br>227.010         | TPA-EG-TPA                                                    |
| 9        | 6.93                 | MS ES-                    | 23599126 | 39.31       | 112.960,114.330,<br>239.210         | PET dimer isomer + propylene glycol<br>terephthalate oligomer |
| 10       | 10                   | MS ES-                    | 15710804 | 26.17       | 90.930,113.030,<br>227.070          | ethylene glycol terephthalate trimer and<br>tis fragments     |

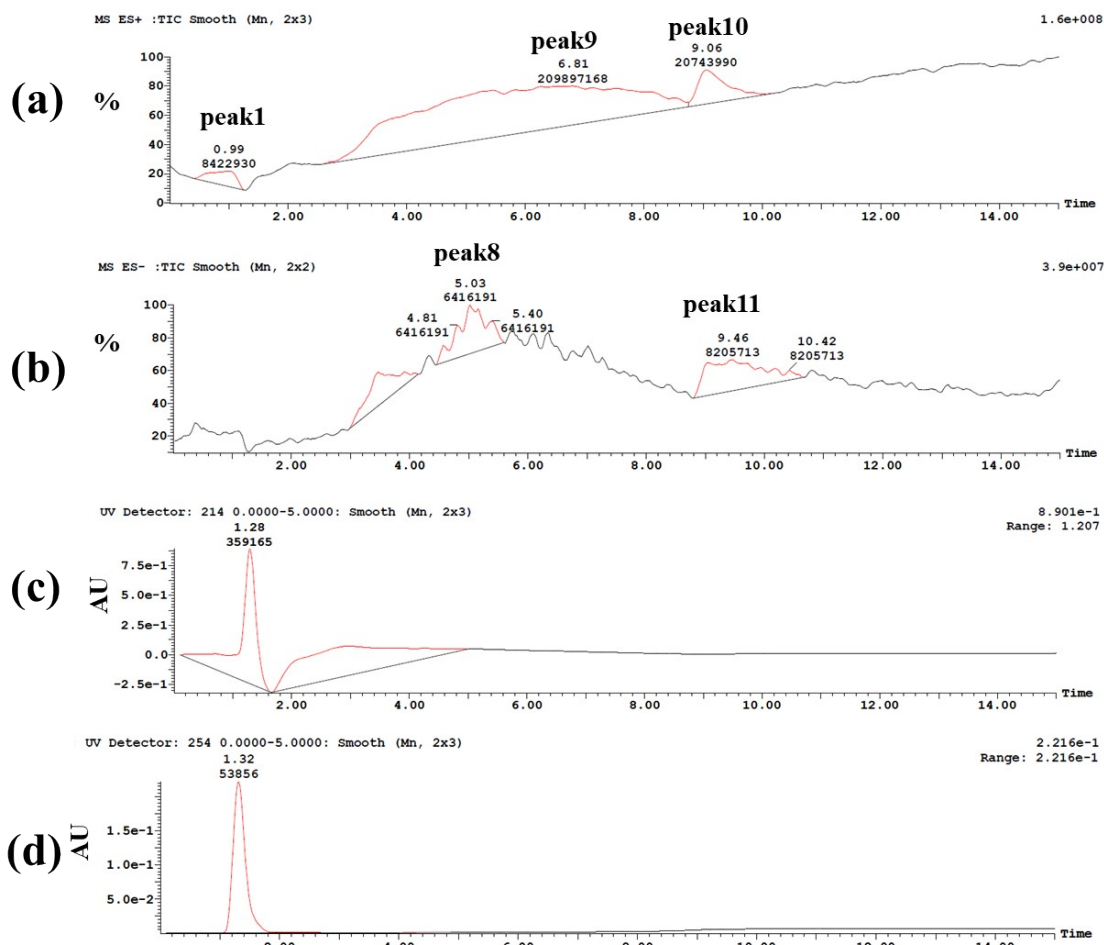

Fig S7. LC-MS and UV analysis of the PLA degradation solution: (a) Total ion chromatogram (TIC) obtained in MS ES<sup>+</sup>; (b) TIC of MS ES<sup>-</sup>; (c) UV absorbance chromatogram detected at 214 nm; (d) UV absorbance chromatogram detected at 254 nm.

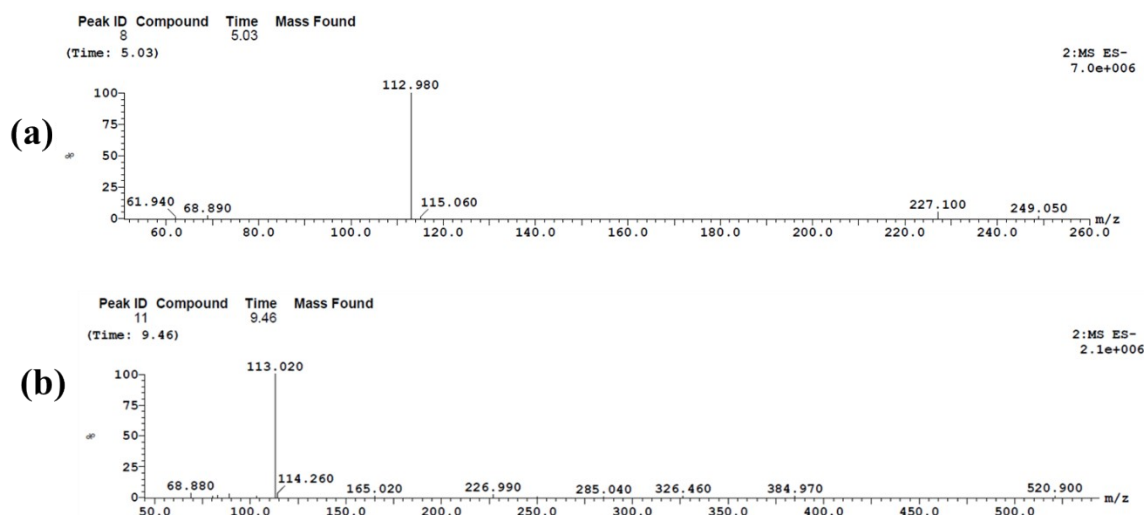

Fig S8 Negative-ion mode MS/MS spectra of the main target compounds in PLA degradation solution.

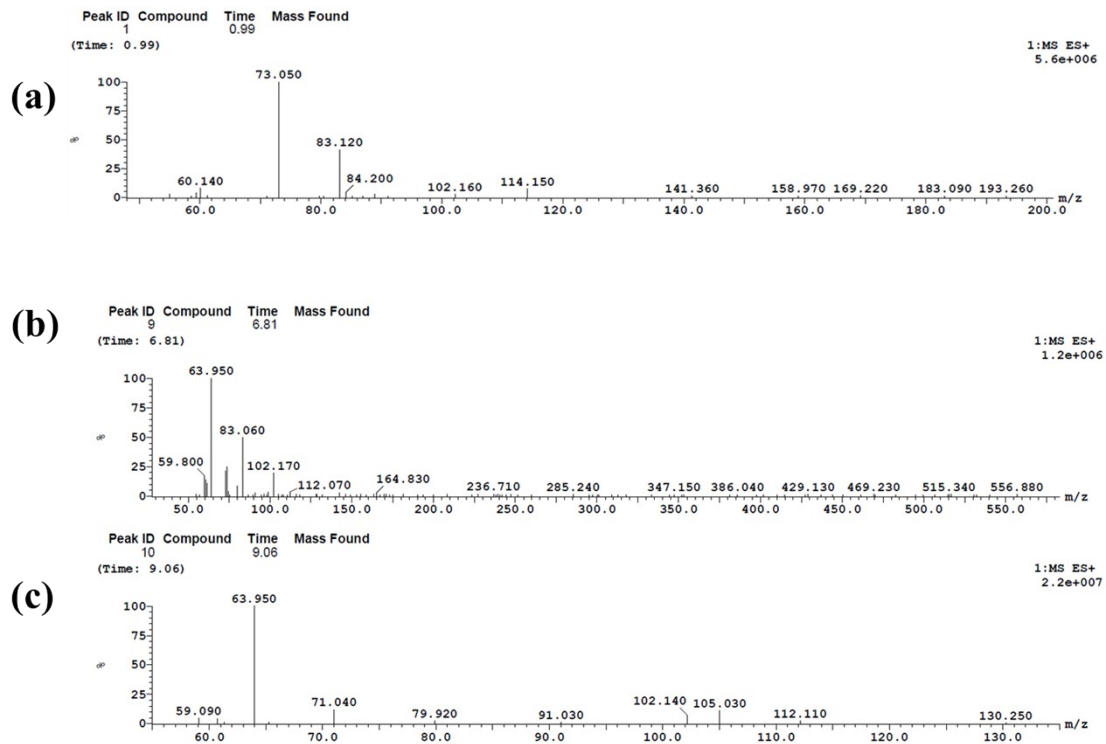

Fig S9 Positive-ion mode MS/MS spectra of the main target compounds in PLA degradation solution.

Table S4 LC-MS Data for PLA degradation solution.

| No. | Retention Time (min) | Main Detection Module | AreaAbs       | Area %Total | m/z                                                                   | Possible Substance   |
|-----|----------------------|-----------------------|---------------|-------------|-----------------------------------------------------------------------|----------------------|
| 1   | 0.99                 | MS ES+                | 8422930       | 3.52        | 73.050, 83.120                                                        | Lactic acid monomer  |
| 8   | 5.03                 | MS ES-                | 6416191       | 33.74       | 112.980, 61.940, 68.890, 115.060, 227.100, 249.050                    | Lactic acid tetramer |
| 9   | 6.81                 | MS ES+                | 20989716<br>8 | 87.8        | 63.950, 83.060, 112.070, 236.710, 285.240, 386.040                    | Lactic acid dimer    |
| 10  | 9.06                 | MS ES+                | 20743990      | 8.68        | 63.950, 71.040, 79.920, 91.030, 102.140, 112.110                      | Lactic acid trimer   |
| 11  | 9.46                 | MS ES-                | 8205713       | 43.14       | 113.020, 68.880, 114.260, 165.020, 226.990, 285.040, 384.970, 520.900 | Lactic acid hexamer  |

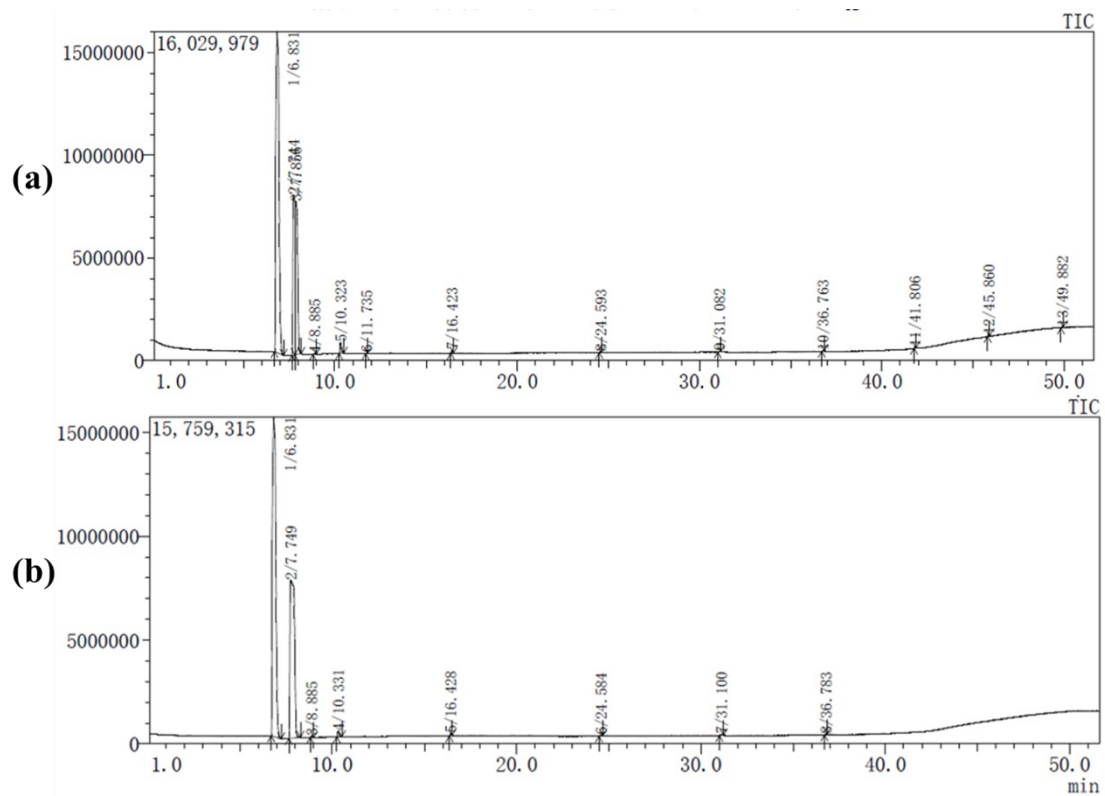

Fig S10. TIC obtained by HS-GC-MS analysis of (a) PET degradation solution and (b) PLA degradation solution.

**Table S5** HS-GC-MS Data of PET and PLA degradation solution.

| Sample | NO. | Retention Time (min) | Compound Name                                         | Peak Area | Peak Area (%) | m/z   | SI |
|--------|-----|----------------------|-------------------------------------------------------|-----------|---------------|-------|----|
| PET    | 1   | 6.831                | Nitrogen                                              | 189281030 | 58.92         | 28.1  | 75 |
|        | 2   | 7.744                | Water                                                 | 54687015  | 17.02         | 18.1  | 95 |
|        | 3   | 7.856                | Water                                                 | 72580712  | 22.59         | 18.1  | 96 |
|        | 4   | 8.885                | Acetaldehyde                                          | 209371    | 0.07          | 29.1  | 91 |
|        | 5   | 10.323               | Ethanol                                               | 2758732   | 0.86          | 31.1  | 95 |
|        | 6   | 11.735               | Acetone                                               | 52810     | 0.02          | 43.05 | 85 |
|        | 7   | 16.423               | Ethyl Acetate                                         | 591899    | 0.18          | 43.05 | 97 |
|        | 8   | 24.593               | Cyclotrisiloxane, hexamethyl-                         | 84419     | 0.03          | 207   | 82 |
|        | 9   | 31.082               | Cyclotetrasiloxane, octamethyl-                       | 180693    | 0.07          | 281.1 | 81 |
|        | 10  | 36.763               | Cyclopentasiloxane, decamethyl-                       | 138052    | 0.06          | 73    | 78 |
|        | 11  | 41.806               | Cyclohexasiloxane, dodecamethyl-                      | 234357    | 0.08          | 73.05 | 84 |
|        | 12  | 45.86                | Hexasiloxane, 1,1,3,3,5,5,7,7,9,9,11,11-dodecamethyl- | 262537    | 0.06          | 73.05 | 68 |
|        | 13  | 49.882               | 2,6-Dihydroxybenzoic acid,3TMS derivative             | 181044    | 0.04          | 73.05 | 63 |
| PLA    | 1   | 6.831                | Nitrogen                                              | 189435352 | 58.35         | 28    | 76 |
|        | 2   | 7.749                | Water                                                 | 132321353 | 40.76         | 18    | 95 |
|        | 3   | 8.885                | Acetaldehyde                                          | 351235    | 0.11          | 44    | 92 |
|        | 4   | 10.331               | Ethanol                                               | 1524230   | 0.47          | 31    | 94 |
|        | 5   | 16.428               | Ethyl Acetate )                                       | 502692    | 0.15          | 43    | 94 |
|        | 6   | 24.584               | Cyclotrisiloxane, hexamethyl-                         | 175690    | 0.05          | 207   | 85 |
|        | 7   | 31.1                 | Cyclotetrasiloxane, octamethyl-                       | 237278    | 0.07          | 281   | 84 |
|        | 8   | 36.783               | Cyclopentasiloxane, decamethyl-                       | 94386     | 0.03          | 355   | 76 |
